# Supplementary material for: Amphiphilic Anionic Oligomer-Stabilized Calcium Phosphate Nanoparticles with Prospects in siRNA Delivery via Convection-Enhanced Delivery
Source: MDPI journal article supplement (doi:10.3390/pharmaceutics14020326), 2022-01-29
Supplement: s1 [file s1]

# Supplementary Materials: Amphiphilic Anionic Oligomer-Stabilized Calcium Phosphate Nanoparticles with Prospects in siRNA Delivery via Convection-Enhanced Delivery

Franziska Mitrach, Maximilian Schmid, Magali Toussaint, Sladjana Dukic-Stefanovic, Winnie Deuther-Conrad, Heike Franke, Alexander Ewe, Achim Aigner, Christian Wölk, Peter Brust, Michael C. Hacker and Michaela Schulz-Siegmund

## Structural analysis of pristine oligomer

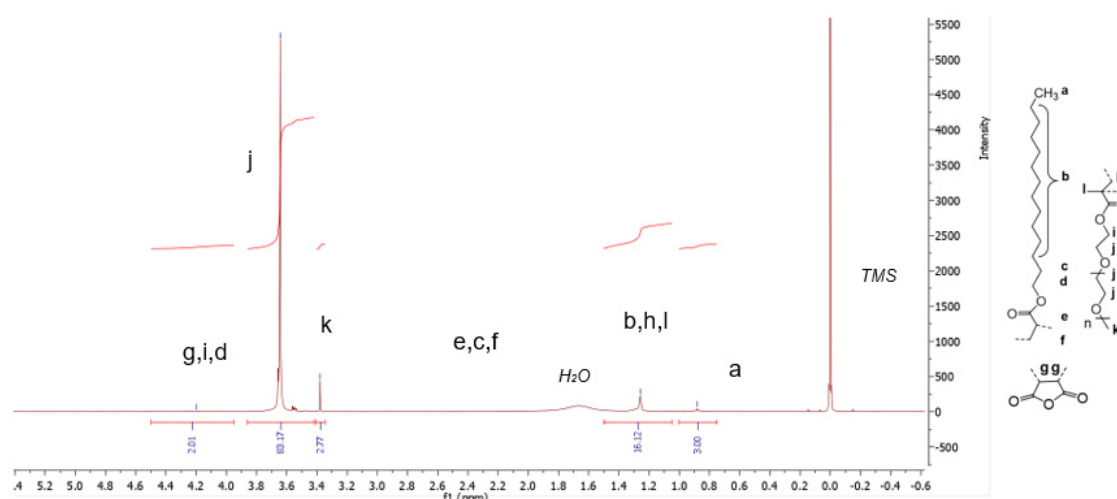

**Figure S1.**  $^1\text{H}$ -NMR of o14PEGMA (04/04/10) in  $\text{CDCl}_3$  with 0.03% TMS,  $c = 0.5 \text{ mg/ml}$   
 $\delta$  [ppm] 0.75-1.00 ; 1.05-1.50; 3.35-3.40; 3.42-3.86; 3.95-4.50

## Size exclusion chromatography of pristine oligomer stabilizer

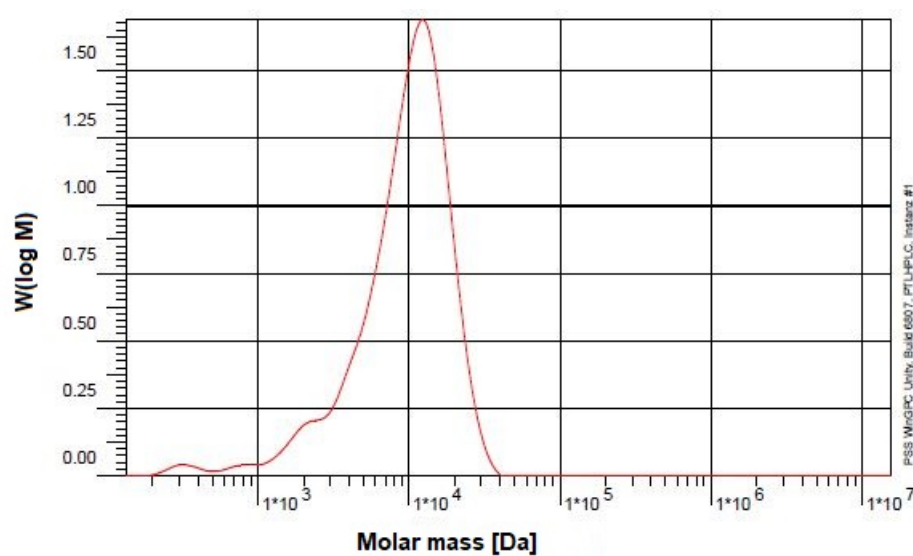

**Figure S2.** Gel permeation chromatography chromatograms of o14PEGMA(1:1:2.5) to determine size distribution  
c = 10mg/ml in THF ; V = 40  $\mu$ l; flow rate=1ml/min; n=3

Impact of oligomer concentration on CaP-NP stabilization.

|                                                       |                                          |          | Size distribution                                                                                                                 |                                                                                                                                    |
|-------------------------------------------------------|------------------------------------------|----------|-----------------------------------------------------------------------------------------------------------------------------------|------------------------------------------------------------------------------------------------------------------------------------|
|                                                       |                                          |          | t = 5 min                                                                                                                         | t = 30 min                                                                                                                         |
| 2 $\mu\text{mol/L}$ o14PEGMA(1:1:2.5)_NH <sub>3</sub> | 1.5 mmol/L PO <sub>4</sub> <sup>3-</sup> | Method 1 | 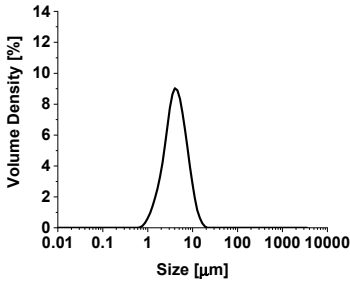 <p>D[4;3] = 5.05 <math>\mu\text{m}</math></p>   |  <p>D[4;3] = 194 <math>\mu\text{m}</math></p>    |
|                                                       |                                          | Method 2 |  <p>D[4;3] = 151 <math>\mu\text{m}</math></p>   |  <p>D[4;3] = 88.4 <math>\mu\text{m}</math></p>  |
|                                                       | 6.0 mmol/L PO <sub>4</sub> <sup>3-</sup> | Method 1 |  <p>D[4;3] = 8.45 <math>\mu\text{m}</math></p> |  <p>D[4;3] = 19.1 <math>\mu\text{m}</math></p> |
|                                                       |                                          | Method 2 |  <p>D[4;3] = 6.72 <math>\mu\text{m}</math></p> |  <p>D[4;3] = 29.8 <math>\mu\text{m}</math></p> |

|                                                       |                                          |          | Size distribution                                                                                                  |                                                                                                                     |
|-------------------------------------------------------|------------------------------------------|----------|--------------------------------------------------------------------------------------------------------------------|---------------------------------------------------------------------------------------------------------------------|
|                                                       |                                          |          | t = 5 min                                                                                                          | t = 30 min                                                                                                          |
| 5 $\mu\text{mol/L}$ o14PEGMA(1:1:2.5)_NH <sub>3</sub> | 1.5 mmol/L PO <sub>4</sub> <sup>3-</sup> | Method 1 | 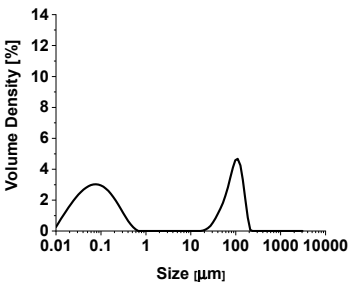<br>D[4;3] = 39.6 $\mu\text{m}$   | <br>D[4;3] = 166 $\mu\text{m}$    |
|                                                       |                                          | Method 2 | <br>D[4;3] = 89.2 $\mu\text{m}$  | <br>D[4;3] = 104 $\mu\text{m}$   |
|                                                       | 6.0 mmol/L PO <sub>4</sub> <sup>3-</sup> | Method 1 | <br>D[4;3] = 3.21 $\mu\text{m}$ | <br>D[4;3] = 31.4 $\mu\text{m}$ |
|                                                       |                                          | Method 2 | <br>D[4;3] = 4.77 $\mu\text{m}$ | <br>D[4;3] = 20.6 $\mu\text{m}$ |

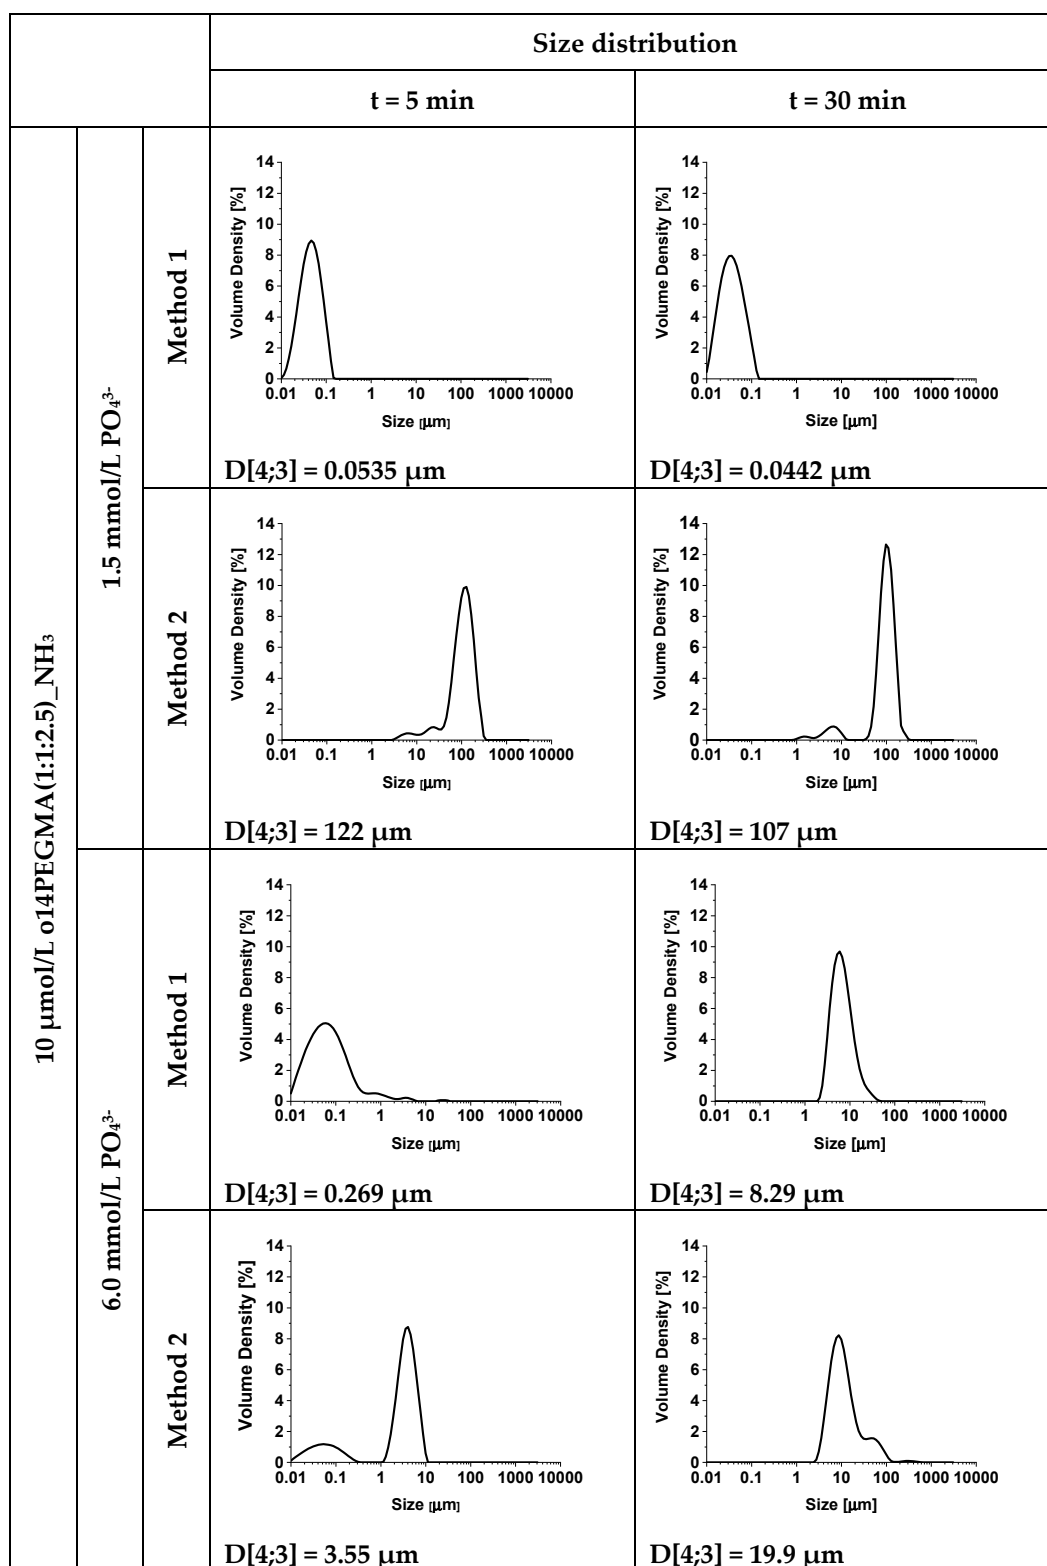

**Figure S3.** Influence of oligomer concentration on size distribution and aggregation of CaP particles determined by Laser diffraction analysis.

NTA screenshots for analysis of aggregation status

| 10 μmol/L o14PEGMA(1:1:2.5) _NH <sub>3</sub> |          |                                                                                     | 0 μmol/L siRNA                                                                       | 1 μmol/L siRNA                                                                        | 10 μmol/L siRNA |
|----------------------------------------------|----------|-------------------------------------------------------------------------------------|--------------------------------------------------------------------------------------|---------------------------------------------------------------------------------------|-----------------|
| 1.5 mmol/L PO <sub>4</sub> <sup>3-</sup>     | Method 1 | 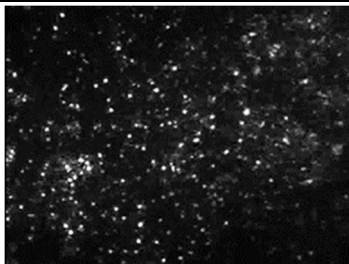   |    |    |                 |
|                                              | Method 2 |    |    |    |                 |
| 3.75 mmol/L PO <sub>4</sub> <sup>3-</sup>    | Method 1 |   |   |   |                 |
|                                              | Method 2 |  |  |  |                 |
| 6.0 mmol/L PO <sub>4</sub> <sup>3-</sup>     | Method 1 |  |  |  |                 |
|                                              | Method 2 |  |  |  |                 |
|                                              |          |                                                                                     | 0 μmol/L siRNA                                                                       | 1 μmol/L siRNA                                                                        | 10 μmol/L iRNA  |



| 40 $\mu\text{mol/L}$ o14PEGMA(1:1:2.5)_NH <sub>3</sub>                                |                                                                                       |                                                                                       |                                                                                     |                                                                                     |                                                                                     |
|---------------------------------------------------------------------------------------|---------------------------------------------------------------------------------------|---------------------------------------------------------------------------------------|-------------------------------------------------------------------------------------|-------------------------------------------------------------------------------------|-------------------------------------------------------------------------------------|
| 6.0 mmol/L PO <sub>4</sub> <sup>3-</sup>                                              |                                                                                       | 3.75 mmol/L PO <sub>4</sub> <sup>3-</sup>                                             |                                                                                     | 1.5 mmol/L PO <sub>4</sub> <sup>3-</sup>                                            |                                                                                     |
| Method 2                                                                              | Method 1                                                                              | Method 2                                                                              | Method 1                                                                            | Method 2                                                                            | Method 1                                                                            |
| 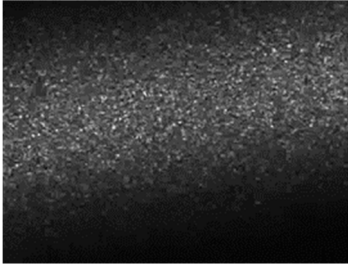   |    |    |    |    |    |
|   |   |   |   |   |   |
|  |  |  |  |  |  |

**Figure S4.** NTA screenshots of CaP-NP formulation 30 min after fabrication.

Impact of cell culture medium & serum proteins on size distribution of CaP-NP

|                                                    |                                                        | 0 $\mu\text{mol/L}$ siRNA                                                                                                                                                                    | 1 $\mu\text{mol/L}$ siRNA                                                                                                                                                                     |
|----------------------------------------------------|--------------------------------------------------------|----------------------------------------------------------------------------------------------------------------------------------------------------------------------------------------------|-----------------------------------------------------------------------------------------------------------------------------------------------------------------------------------------------|
| Oligomer/ $\text{PO}_4^{3-}$ -concentration/Method | 40 $\mu\text{mol/L}$ /3.75 mmol/L $\text{PO}_4^{3-}/2$ | 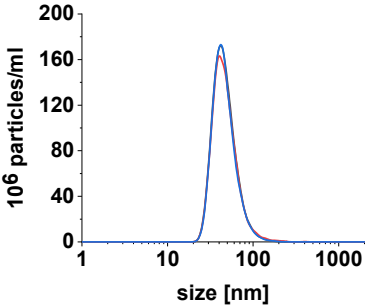 <p>Mean: <math>55 \pm 22</math> nm<br/>Concentration: <math>57.8 \pm 1.1 \cdot 10^8/\text{ml}</math></p>   |  <p>Mean: <math>52 \pm 19</math> nm<br/>Concentration: <math>49.7 \pm 0.2 \cdot 10^8/\text{ml}</math></p>   |
|                                                    |                                                        |                                                                                                            |                                                                                                            |
|                                                    | 40 $\mu\text{mol/L}$ /6.0 mmol/L $\text{PO}_4^{3-}/2$  |  <p>Mean: <math>63 \pm 27</math> nm<br/>Concentration: <math>51.8 \pm 1.0 \cdot 10^8/\text{ml}</math></p> |  <p>Mean: <math>69 \pm 32</math> nm<br/>Concentration: <math>58.6 \pm 0.9 \cdot 10^8/\text{ml}</math></p> |
|                                                    |                                                        |                                                                                                           |                                                                                                           |

Figure S5. Effect of serum proteins and cell culture medium on stability of  $\alpha$ 14PEGMA(1:1:2.5) $_{\text{NH}_3}$ -stabilized CaP-NP after 5 h.



# Cellular Uptake of CaP-NP in F98 cells

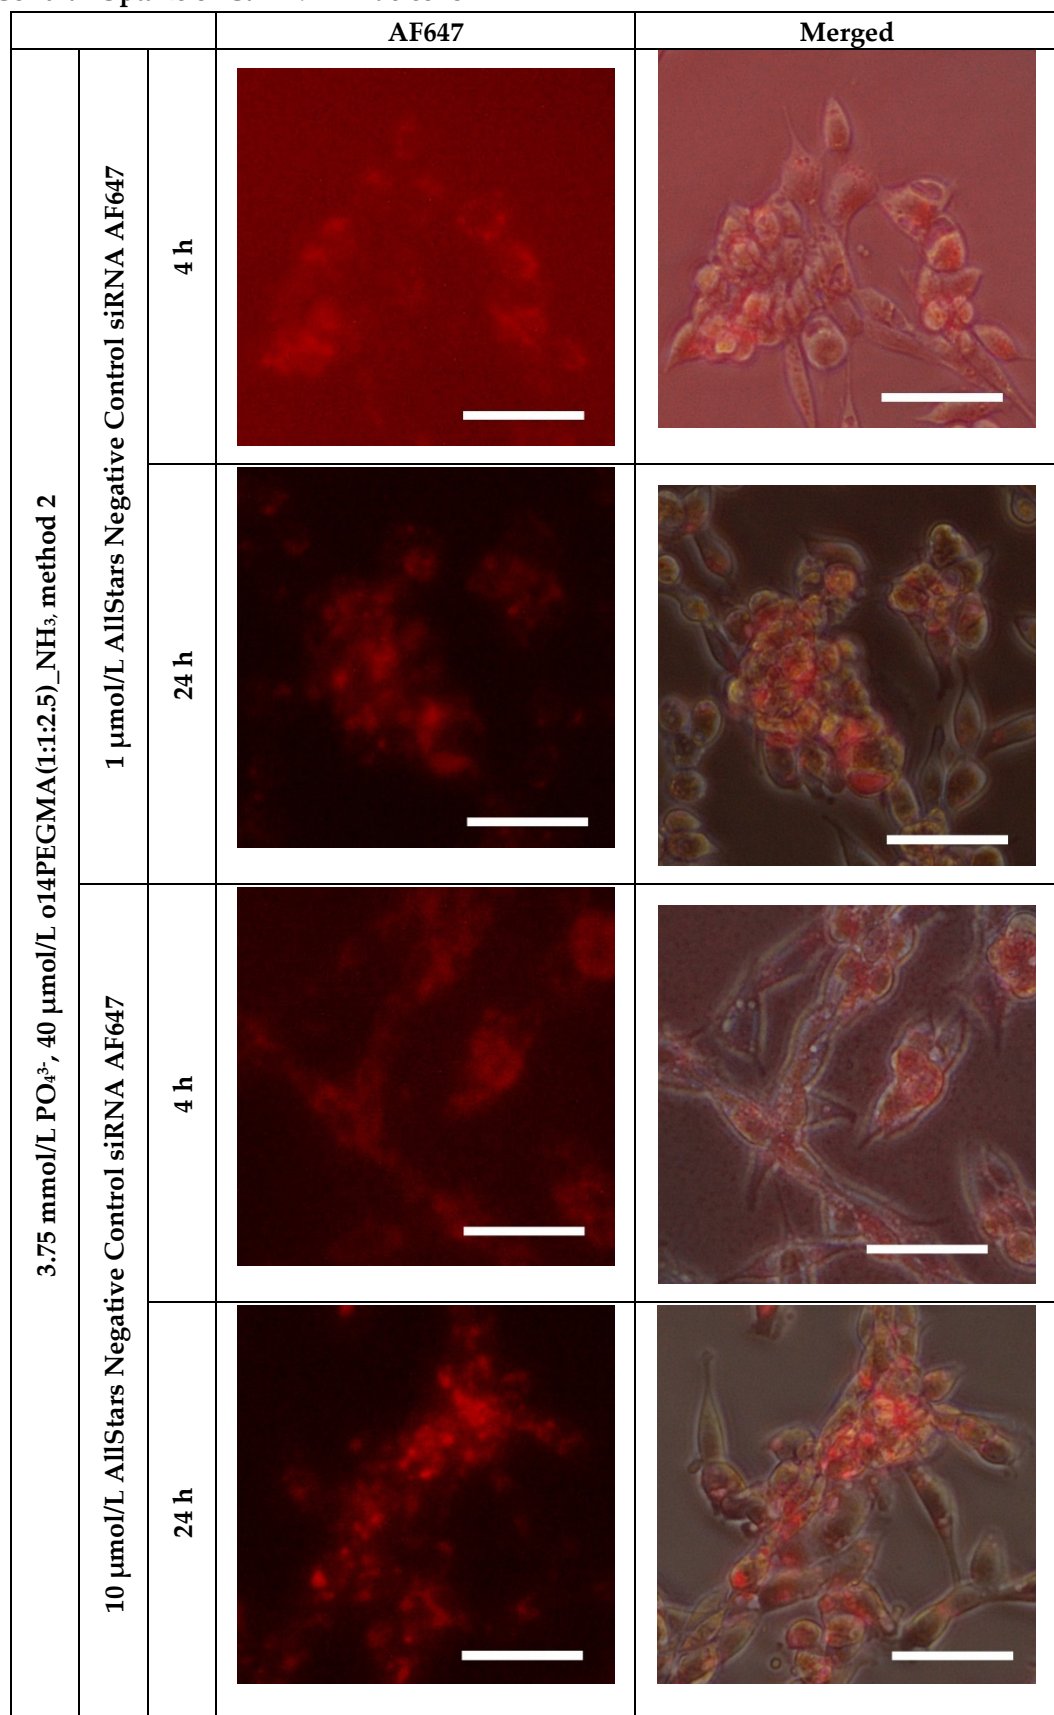

**Figure S6.** Uptake of siRNA (AlexaFluor™ 647 labeled)-loaded o14PEGMA(1:1:2.5) $_{\text{NH}_3}$ -stabilized CaP-NP in F98 cells. Scale bars represent 100  $\mu\text{m}$ .

Live/Dead staining

|                  | Group                                                                                             |                | 24 h                                                                                 | 72 h                                                                                  |
|------------------|---------------------------------------------------------------------------------------------------|----------------|--------------------------------------------------------------------------------------|---------------------------------------------------------------------------------------|
| Non-concentrated | Control                                                                                           | Untreated      | 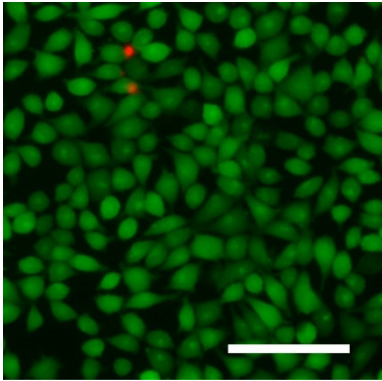   |    |
|                  |                                                                                                   |                |   |   |
|                  | 3.75 mmol/L PO <sub>4</sub> <sup>3-</sup> ,<br>40 μM o14PEGMA(1:1:2.5)_NH <sub>3</sub> , method 2 | 0 μmol/L siRNA |  |  |
|                  |                                                                                                   | 1 μmol/L siRNA |  |  |
|                  |                                                                                                   |                |  |  |
|                  |                                                                                                   |                |  |  |

|  | Group                                                                                             |                 | 24 h                                                                                 | 72 h                                                                                  |
|--|---------------------------------------------------------------------------------------------------|-----------------|--------------------------------------------------------------------------------------|---------------------------------------------------------------------------------------|
|  | Concentrated                                                                                      | Control         | 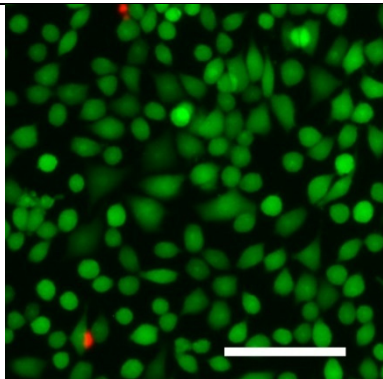   |    |
|  |                                                                                                   | Untreated       |                                                                                      |                                                                                       |
|  | 3.75 mmol/L PO <sub>4</sub> <sup>3-</sup> ,<br>40 μM o14PEGMA(1:1:2.5)_NH <sub>3</sub> , method 2 | 0 μmol/L siRNA  |   |   |
|  |                                                                                                   | 10 μmol/L siRNA |  |  |

**Figure S7.** *In vitro* biocompatibility testing of CaP-NP in L929 cells: Live/Dead staining. Scale bars represent 100 μm.

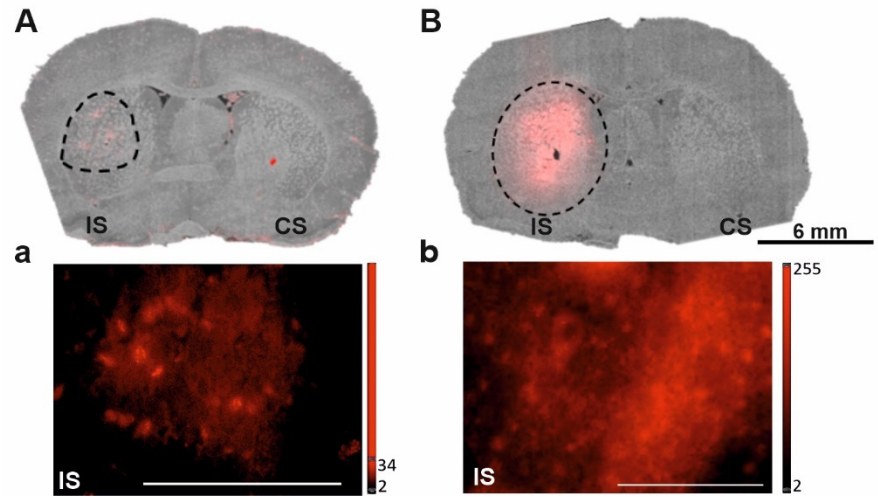

**Figure S8.** *In vivo* biodistribution of CaP-NP loaded with 10  $\mu\text{mol/L}$  AllStars Negative Control siRNA AF647 (A, a) or AllStars Negative Control siRNA AF647 alone (B, b) 1 hour post-CED in healthy brain ( $n=2$ ). Representative brain sections of fluorescence distribution in the whole slide (A, B) and fluorescence of the AllStars Negative Control siRNA AF647 at the injection site within the CaP-NP (a) and alone (b). IS: ipsilateral side (CED injection), CS: contralateral side (control) (scale bars represent 150  $\mu\text{m}$ ,  $\times 40$  magnification).
